# Supplementary material for: Temporal dynamic photochromic materials for advanced anticounterfeiting
Source: Royal Society of Chemistry journal article supplement (doi:10.1039/d3tc02830e), 2023-01-01
Supplement: d3tc02830e1.pdf [file d3tc02830e1.pdf]

## Supporting Information

### **Temporal Dynamic Photochromic Materials for Advanced Anticounterfeiting**

Wei Tang,\* Ping Liang, Xiaoxue Wang, Chen Zhang, Geng Wang, Chen Liang,

Mingxiang Guan\*

*School of Information and Communication, Shenzhen Institute of Information  
Technology, Shenzhen, 518172, China*

\* Corresponding author: Tang Wei, E-mail: tangwei@szit.edu.cn; Guan Mingxiang,

E-mail: gmx2020@126.com

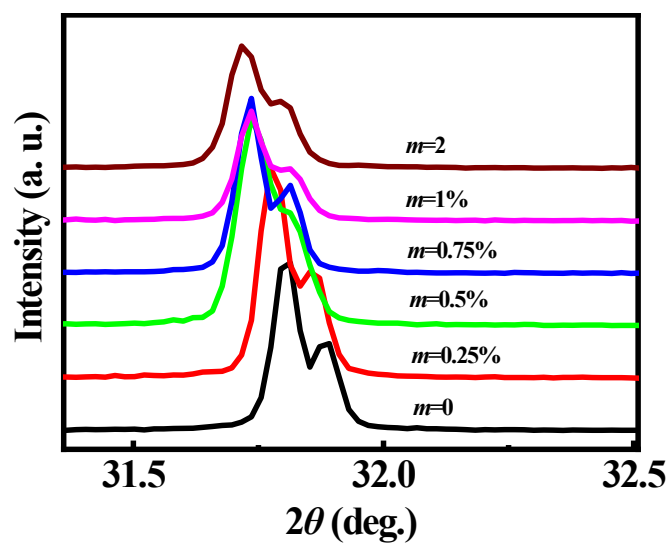

Fig. S1 Magnified region of XRD spectra in the  $2\theta$  range of  $30.5\text{--}32.5^\circ$ .

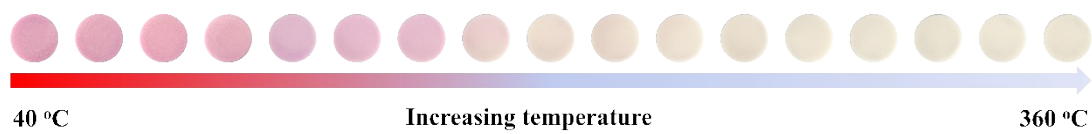

Fig. S2 The photographs of sample before and after heat treatment.

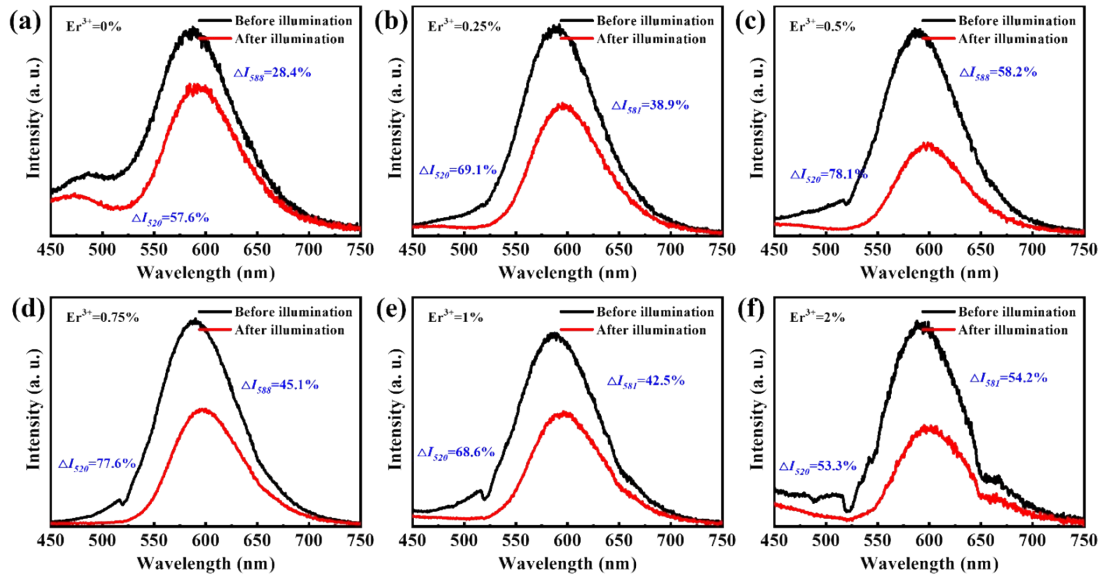

Fig. S3 The PL spectra of BMS: $m\text{Er}^{3+}$  before and after 330 nm illumination, (a)  $m=0$ , (b)  $m=0.25\%$ , (c)  $m=0.5\%$ , (d)  $m=0.75\%$ , (e)  $m=1\%$ , and (f)  $m=2\%$ .

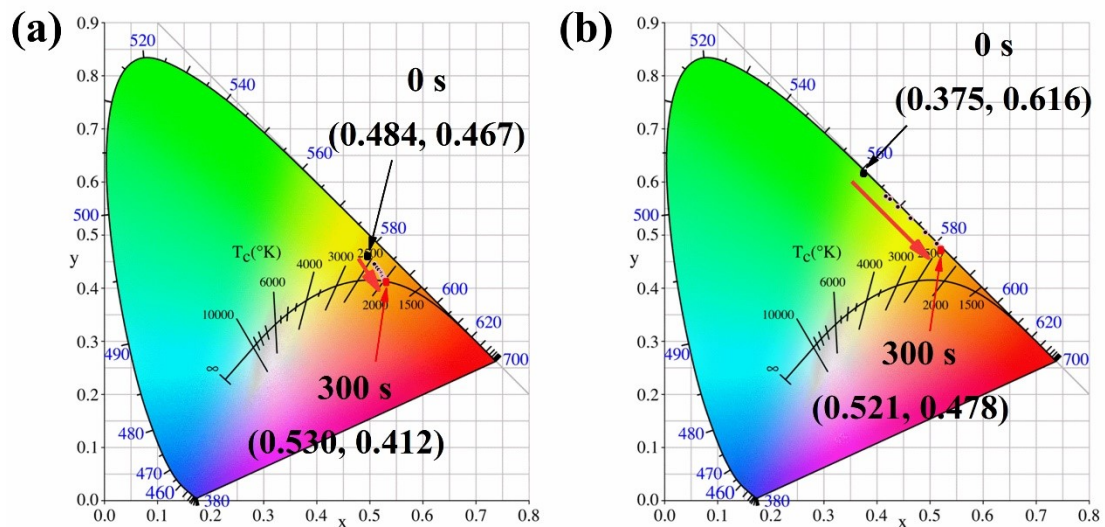

Fig. S4 (a) The CIE chromaticity coordinates of down-conversion, and (b) up-conversion performance.

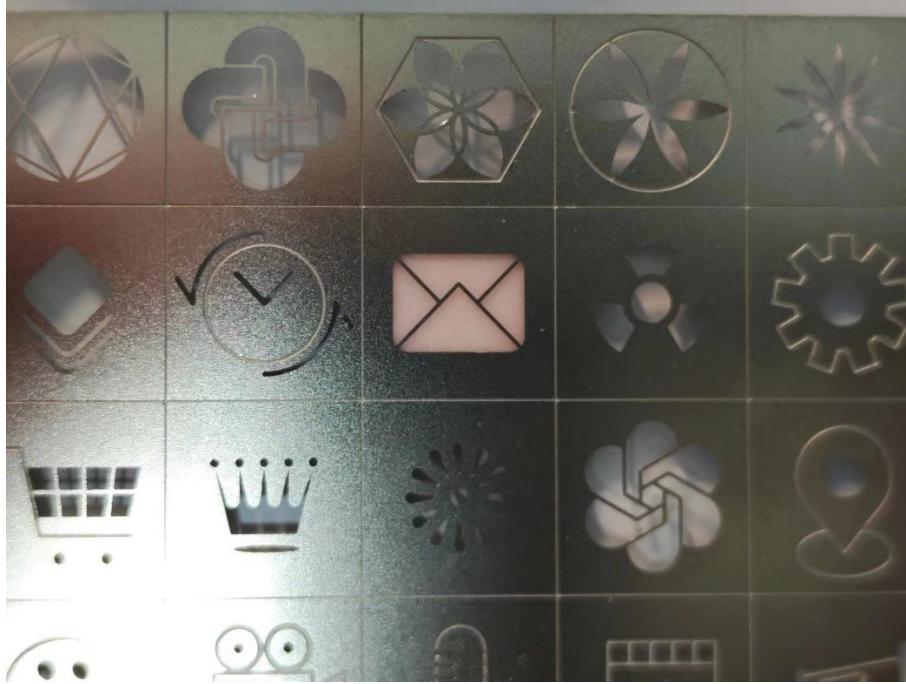

**Fig. S5** The marks used in the printing.
